# Supplementary material for: Universal degradation performance of a high-efficiency AgBr/Ag2CO3 photocatalyst under visible light and an insight into the reaction mechanism
Source: Royal Society of Chemistry journal article supplement (doi:10.1039/c5nj00385g), 2015-01-01
Supplement: c5nj00385g1.pdf [file c5nj00385g1.pdf]

## Electronic Supplementary Information

### for New Journal of Chemistry

#### Universal degradation performances of high-efficiency AgBr/Ag<sub>2</sub>CO<sub>3</sub> photocatalyst under visible light and mechanism insight

Lu Yin <sup>a</sup>, Zhen Wang <sup>b</sup>, Lian Lu<sup>a</sup>, Xiankai Wan<sup>a</sup>, Huixiang Shi<sup>a\*</sup>

a. Department of Environmental Engineering, Zhejiang University, Hangzhou 310058, PR China.

b. Environmental Science Research & Design Institute of Zhejiang Province. Hangzhou 310027, PR China)

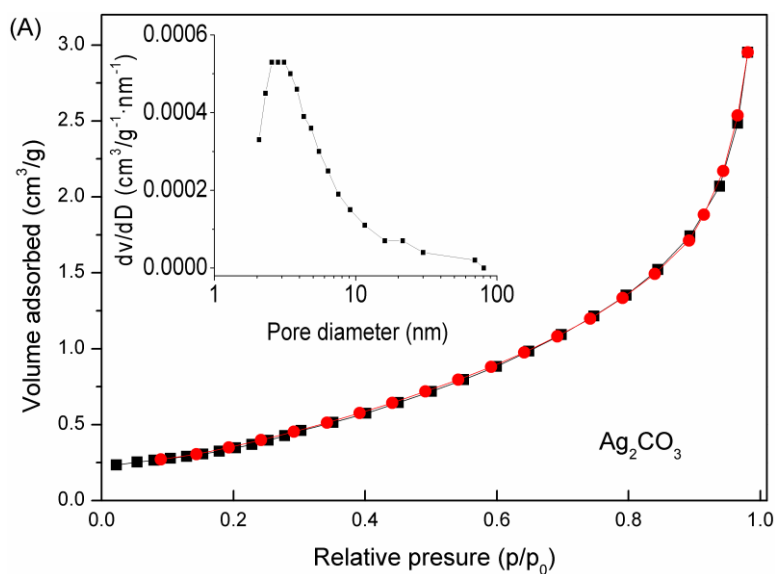

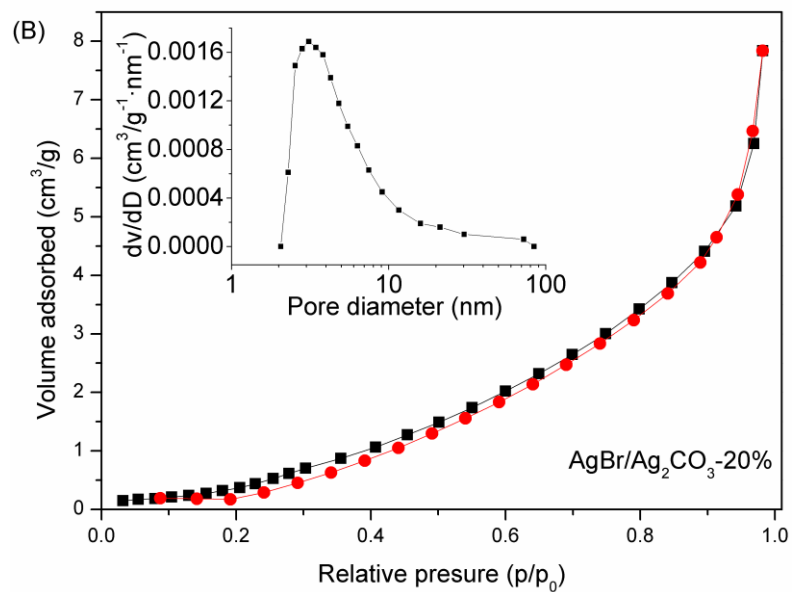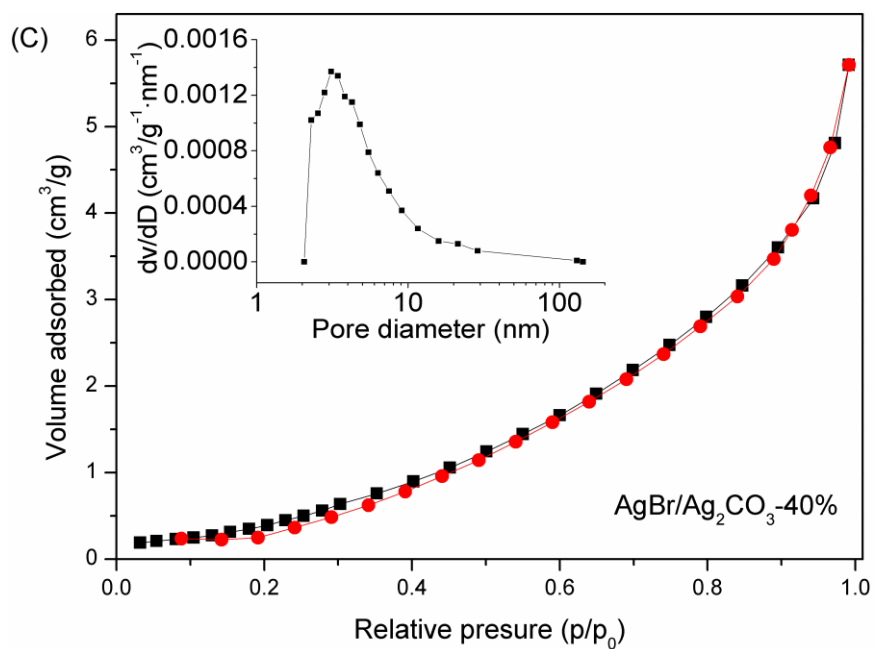

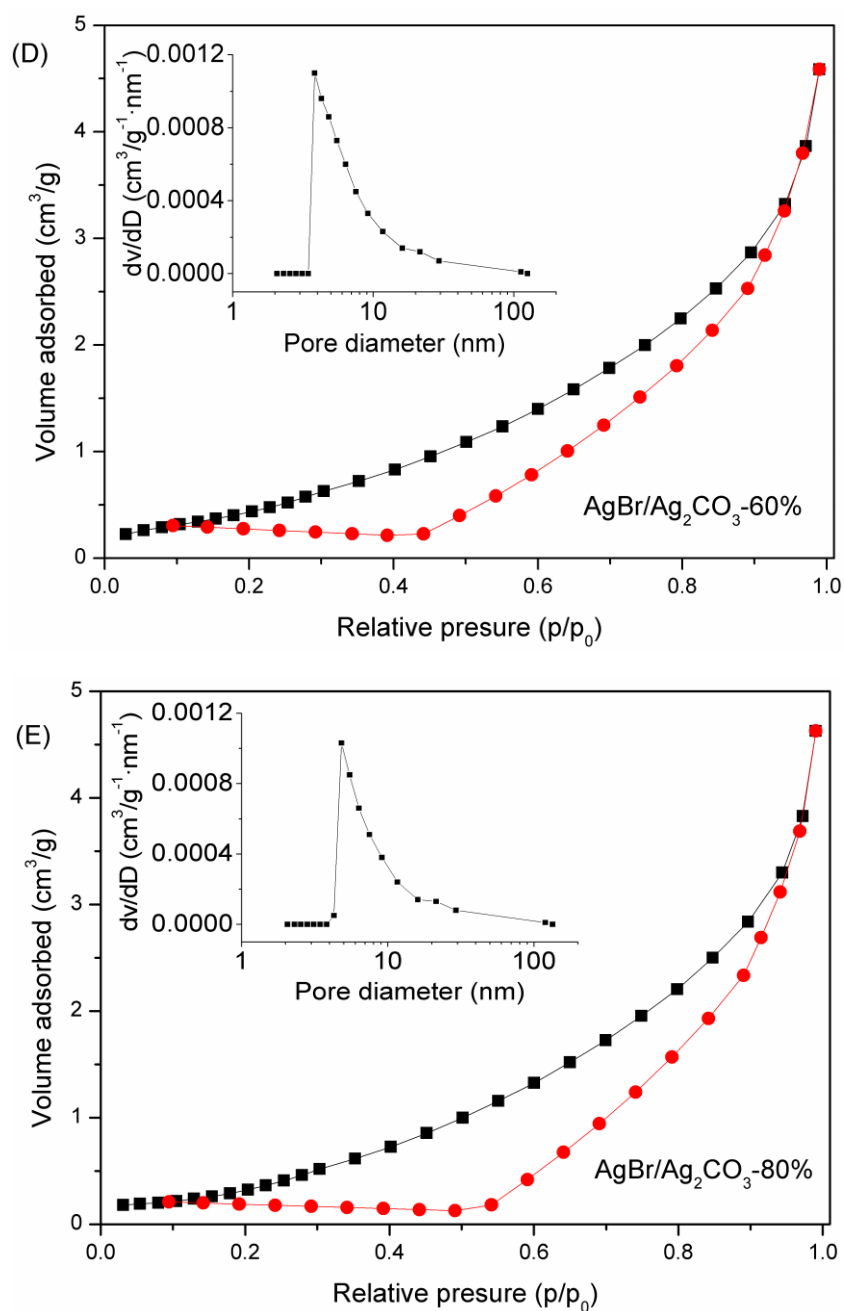

**Fig. SI 1 Nitrogen adsorption-desorption isotherms and the corresponding BJH desorption pore size distribution curves (inset) of pure Ag<sub>2</sub>CO<sub>3</sub> and AgBr/Ag<sub>2</sub>CO<sub>3</sub> hybrids with different AgBr content.**

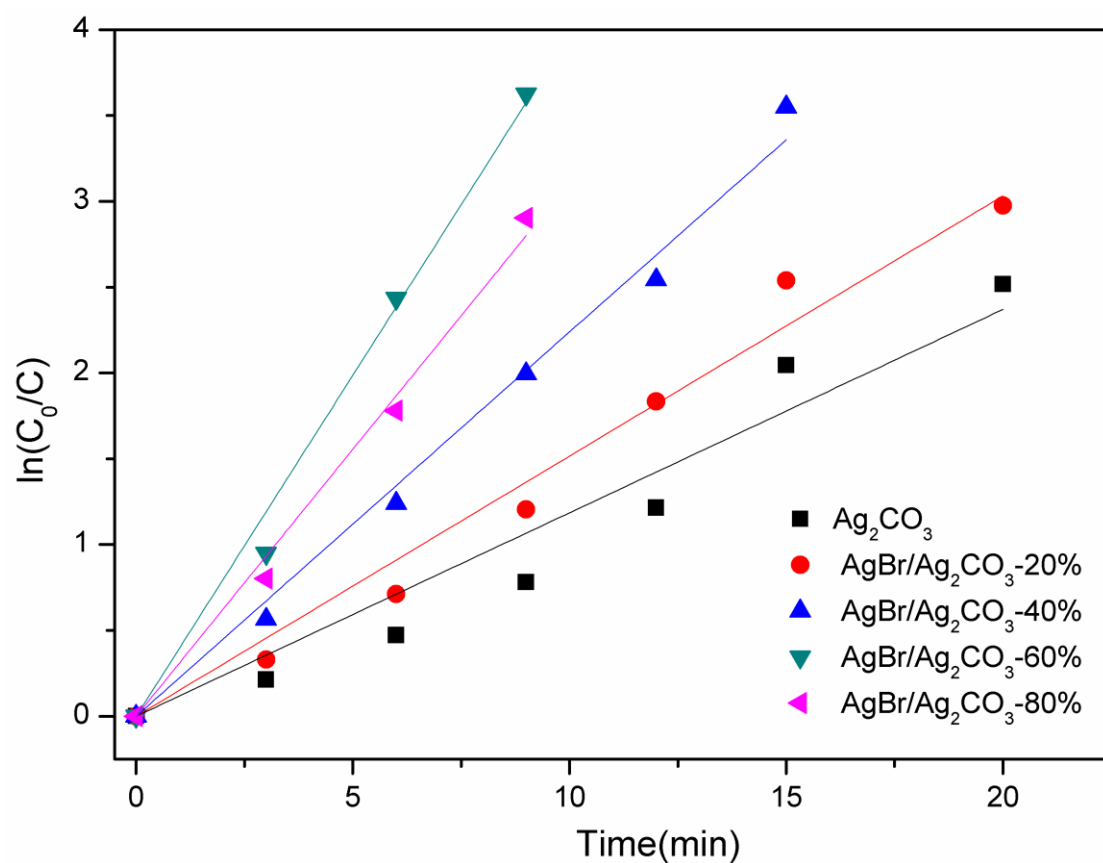

**Fig. SI 2 Linear simulation curves of MO photodegradation using pure  $\text{Ag}_2\text{CO}_3$  and  $\text{AgBr}/\text{Ag}_2\text{CO}_3$  hybrids with different AgBr contents.**

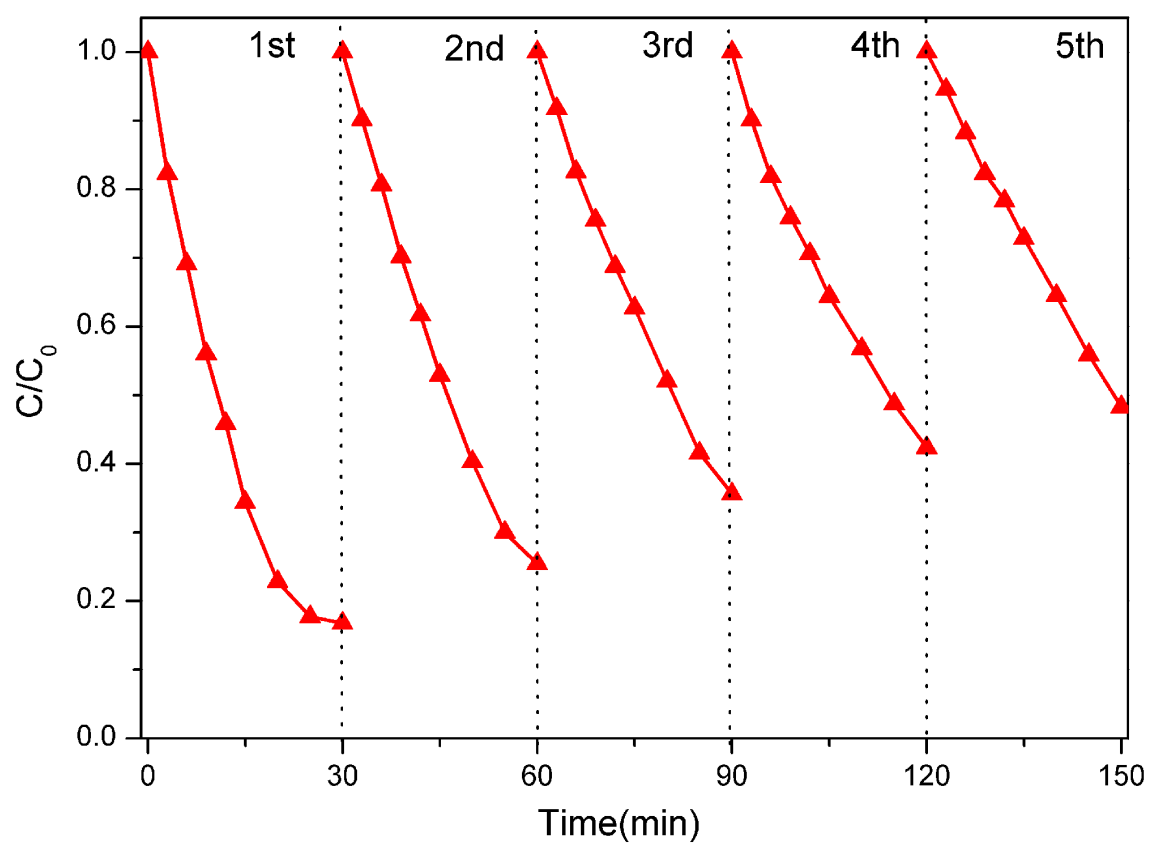

**Fig. SI 3** Cycling runs in the photodegradation of MO in the presence of pure  $\text{Ag}_2\text{CO}_3$  with the addition of  $1\text{mM CO}_3^{2-}$ .

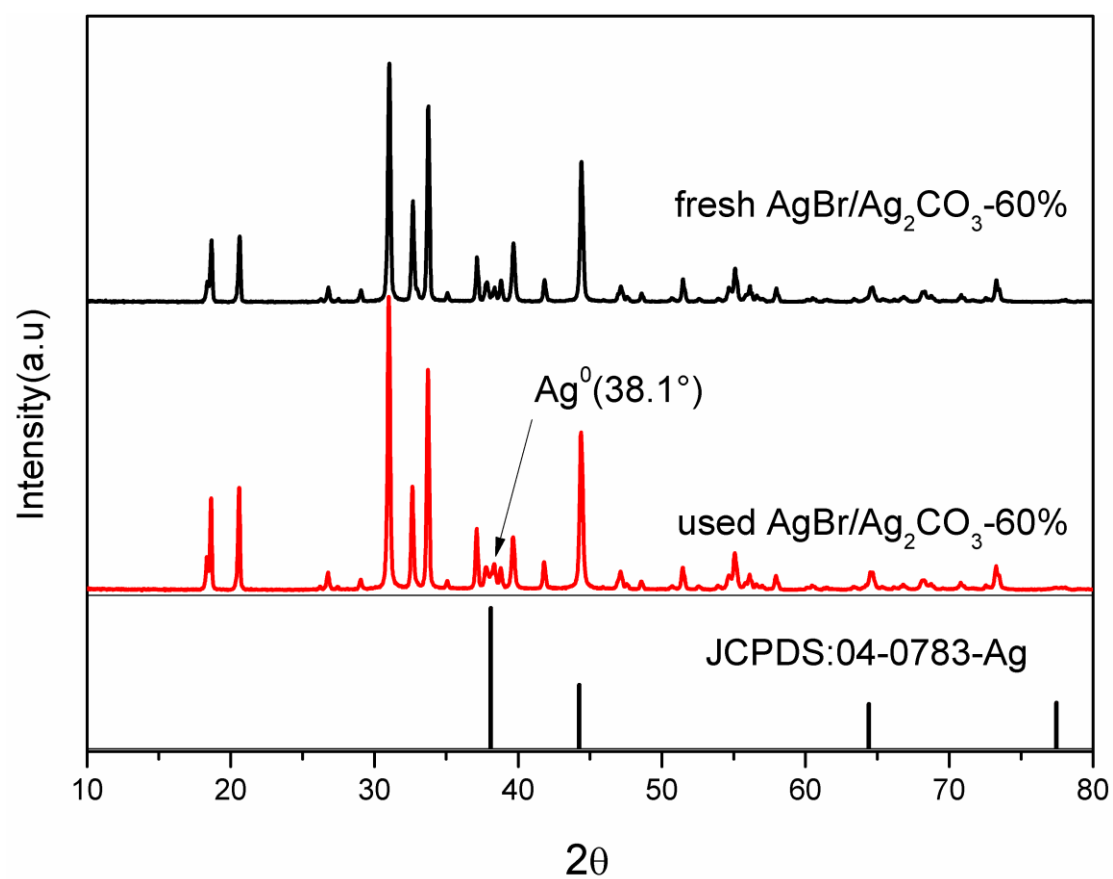

**Fig. SI4 XRD patterns of fresh AgBr/Ag<sub>2</sub>CO<sub>3</sub>-60% and used AgBr/Ag<sub>2</sub>CO<sub>3</sub>-60%.**
